# Supplementary material for: Bifunctional superparamagnetic surface molecularly imprinted polymer core-shell nanoparticles
Source: Royal Society of Chemistry journal article supplement (doi:10.1039/b821299f), 2009-01-01
Supplement: b821299f.pdf [file b821299f.pdf]

Supplementary material (ESI) for Journal of Materials Chemistry

The absorption spectrums of bisphenol-A, 4,4'-biphenol and  $\beta$ -estradiol were as below. These data prove that bisphenol-A, 4,4'-biphenol and  $\beta$ -estradiol can be quantified using UV absorption data.

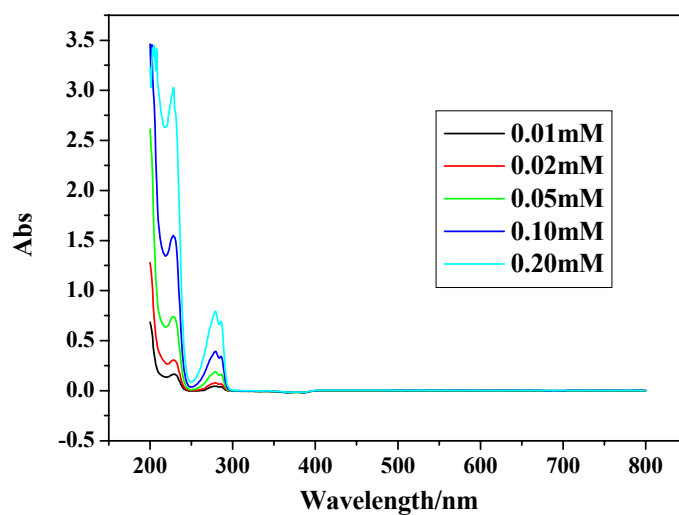

Figure S1 The absorption spectrum of bisphenol-A

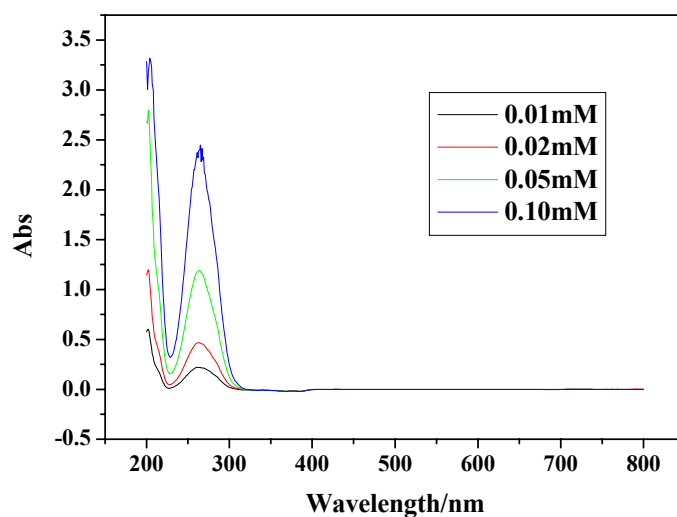

Figure S2 The absorption spectrum of 4,4'-biphenol

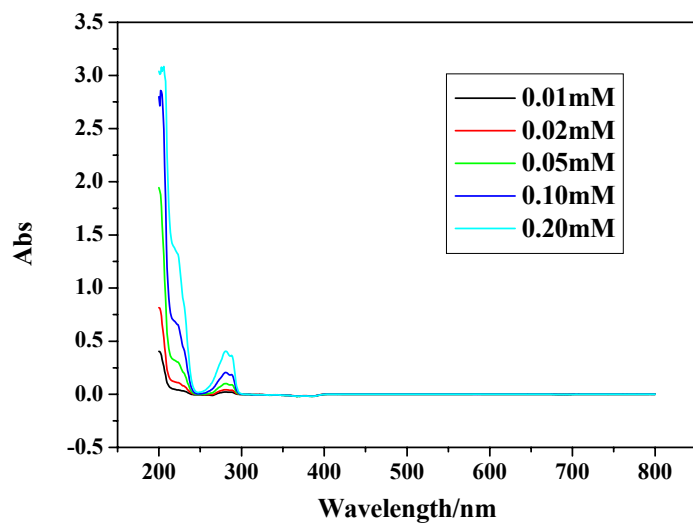

Figure S3 The absorption spectrum of  $\beta$ -estradiol
